# Supplementary material for: Manganese-based metal–organic frameworks with oxidase properties break the temperature limitation of nano enzymes for glutathione detection
Source: Royal Society of Chemistry journal article supplement (doi:10.1039/d4nj03971h), 2024-01-01
Supplement: d4nj03971h1.pdf [file d4nj03971h1.pdf]

## Supporting information

### **Manganese-based metal-organic frameworks with oxidase properties break the temperature limitation of nano enzymes for glutathione detection**

**Xujuan Zhao, Xiaojie Sun, Jinzhi Lv\*, Yanming Miao\***

School of Life Science, Shanxi Normal University, Taiyuan 030006, PR China

\*Corresponding author. E-mail address: [mym8207@126.com](mailto:mym8207@126.com) (Y. Miao),

[lvjinzhi208@126.com](mailto:lvjinzhi208@126.com) (J. Lv).

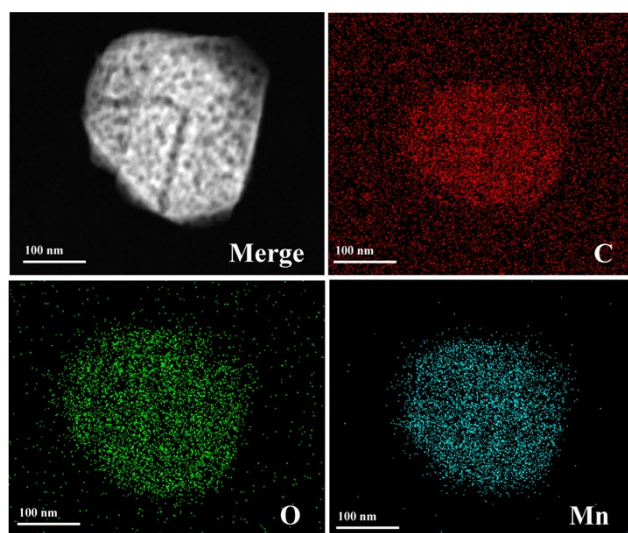

**Fig. S1** Element distribution map of Mn/BTC-MOF

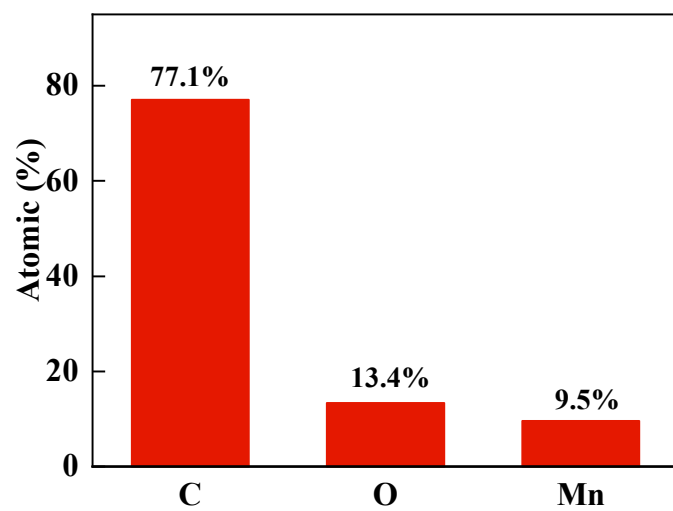

**Fig. S2** Atomic ratio of C, O, and Mn in Mn/BTC-MOF

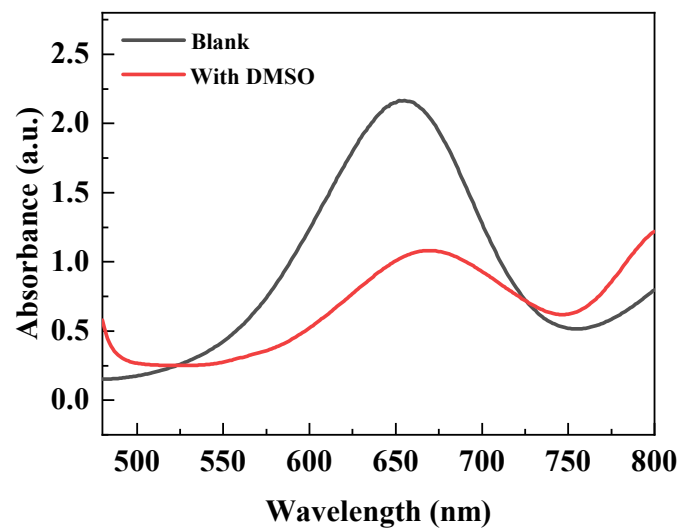

**Fig. S3** Absorption spectra of Mn/BTC-MOF for the catalytic oxidation of TMB under water and DMSO conditions.

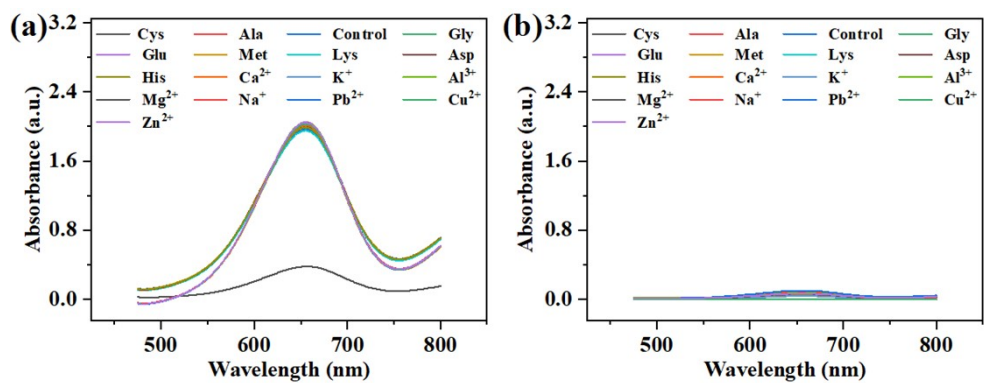

**Fig. S4** (a) Absorption spectra of various interferences on Mn/BTC-MOF-TMB system without adding GSH in Fig. 7a; (b) Absorption spectra of Mn/BTC-MOF-TMB system with various interferences in the presence of GSH in Fig. 7a.

**Table S1** Comparison of catalytic kinetic parameters

| Catalyst                        | Substrate | $K_m$ (mM) | $V_{max}$ ( $\times 10^{-8}$ M $\cdot$ s $^{-1}$ ) | Ref.      |
|---------------------------------|-----------|------------|----------------------------------------------------|-----------|
| MnCO <sub>3</sub> NPs           | TMB       | 0.0233     | 1.29                                               | 1         |
| MIL-53(Fe)                      | TMB       | 0.0108     | 8.78                                               | 2         |
| AuNBPs@CuZn MOF                 | TMB       | 0.372      | 67.97                                              | 3         |
| Au-MSNPs                        | TMB       | 0.22       | 11.8                                               | 4         |
| Ag <sub>1</sub> Pd <sub>1</sub> | TMB       | 0.32       | 11.9                                               | 5         |
| Au@Pt nanodendrites             | TMB       | 0.192      | 8.16                                               | 6         |
| HPR                             | TMB       | 0.434      | 10.0                                               | 7         |
| BTO NPS                         | TMB       | 0.0482     | 0.765                                              | 8         |
| Fe-MOF                          | TMB       | 2.6        | 5.6                                                | 9         |
| Mn/BTC-MOF                      | TMB       | 0.02       | 0.0828                                             | This work |

## References

- 1 L. Zhang, Y. Min, W. Fu, W. Zhang and Y. Wang, *Sci. China Chem.*, 2022, **52**, 1178-1186.
- 2 F.-X. Qin, S.-Y. Jia, F.-F. Wang, S.-H. Wu, J. Song and Y. Liu, *Catal. Sci. Technol.*, 2013, **3**, 2761-2768.
- 3 M. Wang, F. Shi, J. Li, L. Min, Z. Yang and J. Li, *Chem. Commun.*, 2024, **60**, 6019-6022.
- 4 Y. Lin, Z. Li, Z. Chen, J. Ren and X. Qu, *Biomaterials*, 2013, **34**, 2600-2610.
- 5 S. Zheng, Q. Zhang, D. Yin, H. Gu, J. Zhang, W. Li and Y. Fu, *J. Mater. Sci.*, 2021, **56**, 4909-4921.
- 6 J. Bonet-Aleta, J. I. Garcia-Peiro, S. Irusta and J. L. Hueso, *Nanomaterials*, 2022, **12**, 755.
- 7 F. Qiao, L. Chen, X. Li, L. Li and S. Ai, *Sens. Actuators B Chem.*, 2014, **193**, 255-262.
- 8 D. Yang, J. Liu, W. Hu, Y. Xiao, H. Chen, Y. Long and H. Zheng, *Sens. Actuators B Chem.*, 2023, **393**, 134170.
- 9 W. Xu, L. Jiao, H. Yan, Y. Wu, L. Chen, W. Gu, D. Du, Y. Lin and C. Zhu, *ACS Appl. Mater. Interfaces*, 2019, **11**, 22096-22101.
